# Supplementary material for: Enhancer RNA lnc-CES1-1 inhibits decidual cell migration by interacting with RNA-binding protein FUS and activating PPARγ in URPL
Source: PubMed Central journal article supplement — Mol Ther Nucleic Acids. 2021 Feb 18;24:104–12. doi: 10.1016/j.omtn.2021.02.018 (PMC7941017; doi:10.1016/j.omtn.2021.02.018), 2021-02-18

**Supplemental information**

**Enhancer RNA Inc-CES1-1 inhibits decidual  
cell migration by interacting with RNA-binding  
protein FUS and activating PPAR $\gamma$  in URPL**

**Zhenyao Huang, Hao Yu, Guizhen Du, Li Han, Xiaomin Huang, Dan Wu, Xiumei Han, Yankai Xia, Xinru Wang, and Chuncheng Lu**

**Table S1.** Primers for real time qPCR.

| Gene              |         | Sequences of primers (5'-3') |
|-------------------|---------|------------------------------|
| GAPDH             | forward | TGTGGGCATCAATGGATTTGG        |
|                   | reverse | ACACCATGTATTCCGGGTCAAT       |
| lnc-PARK7-1       | forward | ACCATCACCTTAATGGGCTAGA       |
|                   | reverse | TTATGGAACTATGGCACGGTTT       |
| lnc-CES1-1        | forward | ACACCTATGCACCGGCAAC          |
|                   | reverse | TTAGCAGCATTCTTGATGTGTG       |
| lnc-AC040934.1-2  | forward | CCATGAAGGTGTTAAAGGGAAG       |
|                   | reverse | GCAGGATGTAGGGATAGGTTTG       |
| lnc-PEMT-2        | forward | CCACAAGAGGAGCTGATTGAG        |
|                   | reverse | CCTTTATTGGTGAATGGGAATG       |
| lnc-RASD1-4       | forward | GTCATCACCATCACCTTCAATC       |
|                   | reverse | CAGTGCAAAGAAGCTGGAGAG        |
| lnc-SPEG-2        | forward | CTAGGGCTCTGCCCAATGT          |
|                   | reverse | TCATCACCGTCTTCTTGGTATG       |
| lnc-SLC9A8-3      | forward | AAGGCATAGCCAACATGCTAAT       |
|                   | reverse | GGAAGATAGAACAGGCAGCATC       |
| lnc-ADAMTS1-2     | forward | CCCTCATCCTGTAAGGTACTGC       |
|                   | reverse | CAGTCGGTCACGAAAGATGTTA       |
| lnc-RCAN1-1       | forward | GGATGGAAACAAGTGGAAAGATG      |
|                   | reverse | TCTTTACCCAGGTTCTTGCATT       |
| lnc-ERGIC1-4      | forward | ATGTCCTCCACAATGTTAGCAA       |
|                   | reverse | TCTCGAACTCCTGACCTATCTTT      |
| CES1              | forward | ACCCCTGAGGTTTACTCCACC        |
|                   | reverse | TGCACATAGGAGGGTACGAGG        |
| STAT4             | forward | TGTTGGCCCAATGGATTGAAA        |
|                   | reverse | GGAAACACGACCTAACTGTTTCAT     |
| lnc-CES1-1 (ChIP) | forward | CACCCAAGATCCCAAGGCG          |
|                   | reverse | CACCACGTTTTTCATGGGCAG        |
| lnc-CES1-1 (ChIP) | forward | CTTCAGCACAGGGGATGAACA        |
|                   | reverse | ATCACCTTTCTTACCAGAACAG       |
| lnc-CES1-1 (ChIP) | forward | AATGGGCTCGACCAGCTTC          |
|                   | reverse | AGGTGACTCTTTCTAGCATGTGA      |
| lnc-CES1-1 (RIP)  | forward | CTAGGTCCGCTGCGATTTG          |
|                   | reverse | TGAGGTCCCTGTAGACACATGG       |
| lnc-CES1-1 (RIP)  | forward | GACCTTCCCTTCCGACTCCAT        |
|                   | reverse | CGGCAGGTTAGAGCCTTCA          |
| lnc-CES1-1 (RIP)  | forward | CATGGCTTCCTTGTATGATGGT       |

|               |         |                         |
|---------------|---------|-------------------------|
| PPAR $\alpha$ | reverse | CTCAAAGTGGGCGATATTCTG   |
|               | forward | ATGGTGGACACGGAAAGCC     |
| PPAR $\beta$  | reverse | CGATGGATTGCGAAATCTCTTGG |
|               | forward | CAGGCGATGGTGCAACTCATA   |
| PPAR $\gamma$ | reverse | CAGAGCACGTCTTGAGCCA     |
|               | forward | GATGCCAGCGACTTTGACTC    |
|               | reverse | ACCCACGTCATCTTCAGGGA    |

---

**Table S2.** Antibodies for western blot, ChIP, RIP and immunofluorescence.

| Antibodies                       | RRID        | Source                                  |
|----------------------------------|-------------|-----------------------------------------|
| GAPDH (WB1:1000)                 | AB_2715590  | Beyotime Biotechnology, Shanghai, China |
| IgG (ChIP/RIP)                   | AB_97842    | Millipore, Bedford, USA                 |
| H3K4me1 (ChIP)                   | AB_310614   | Millipore, Bedford, USA                 |
| H3K27ac (ChIP)                   | AB_2118291  | Abcam, Cambridge, UK                    |
| CBP (ChIP)                       | AB_2616020  | Cell Signaling Technology, Beverly, USA |
| c-Jun (ChIP)                     | AB_2798752  | Cell Signaling Technology, Beverly, USA |
| STAT4 (ChIP)                     | AB_2255156  | Cell Signaling Technology, Beverly, USA |
| RNA Pol II (RIP)                 | AB_1977470  | Millipore, Bedford, USA                 |
| FUS/TLS (ChIP/RIP)               | AB_11178670 | Cell Signaling Technology, Beverly, USA |
| ELF4b (RIP)                      | AB_1640424  | Abcam, Cambridge, UK                    |
| SF2/ASF(RIP)                     | AB_2798641  | Cell Signaling Technology, Beverly, USA |
| PPAR $\gamma$ (WB1:1000/IF1:100) | AB_2800240  | Cell Signaling Technology, Beverly, USA |
| SMAD3(WB1:1000/IF1:100)          | AB_2193182  | Cell Signaling Technology, Beverly, USA |

**Fig. S1. (a)** Principal component analysis. **(b)** Visualized box plot for compare the distributions of expression values for the samples after normalization. **(c)** Express (FPKM scores) distribution. **(d)** Correlation of each RNA-seq sample with the mean of all samples.

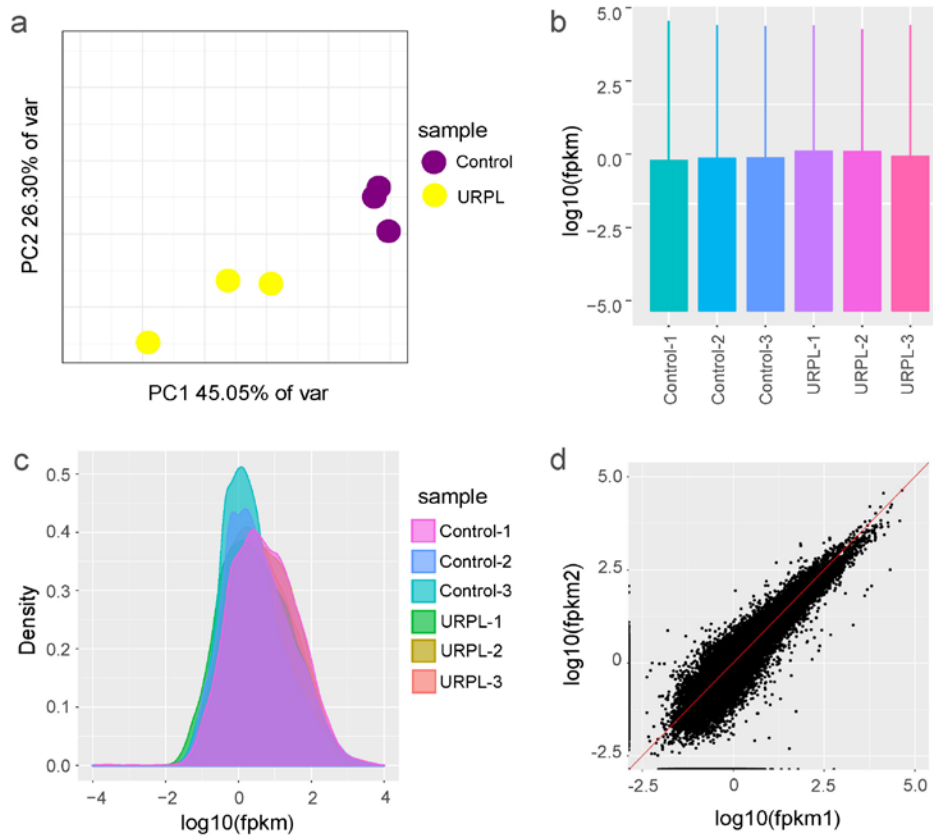

**Fig. S2.** Relative expression of the overexpressed lncRNA after transfection.

Transfection efficiency of **(a)** lnc-ADAMTS1-2, **(b)** lnc-CES1-1 and **(c)**

lnc-PARK7-1 in HTR-8/SVneo, **(d)** lnc-ADAMTS1-2, **(e)** lnc-CES1-1 and **(f)**

lnc-PARK7-1 in JEG-3. \* $P < 0.05$ . Data are presented as mean  $\pm$  SEM. Three repeats

were set up for each treatment.

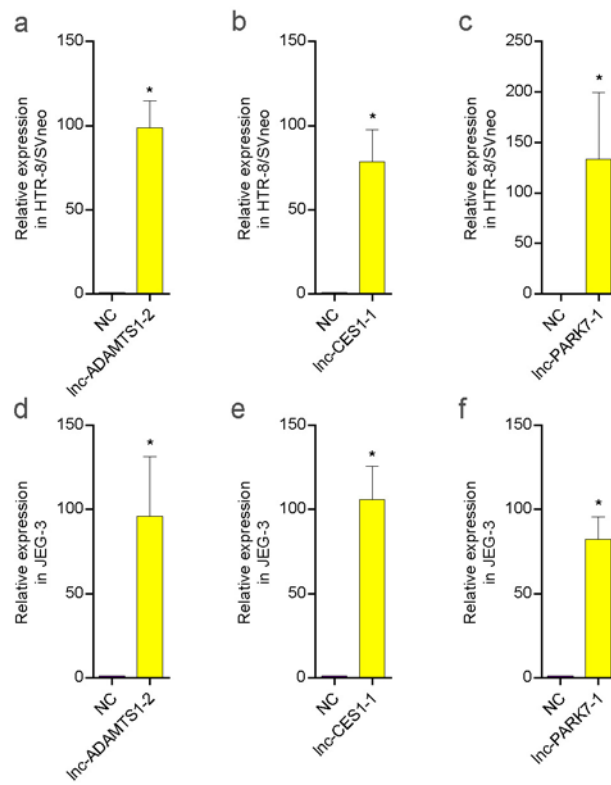

**Figure S3.** Cell proliferation analysis of HTR-8/SVneo of JEG-3 cells at 24h and 48h.

\* $P < 0.05$ . Data are presented as mean  $\pm$ SEM. Three repeats were set up for each treatment.

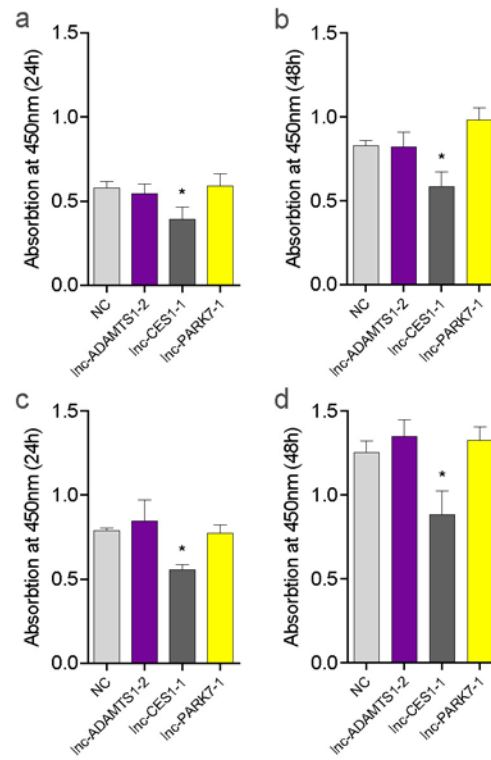

**Figure S4.** Cell apoptosis assay of HTR-8/SVneo and cells overexpressed Inc-ADAMTS1-2 / Inc-CES1-1 / Inc-PARK7-1. \* $P < 0.05$ . Data are presented as mean  $\pm$ SEM. Three repeats were set up for each treatment.

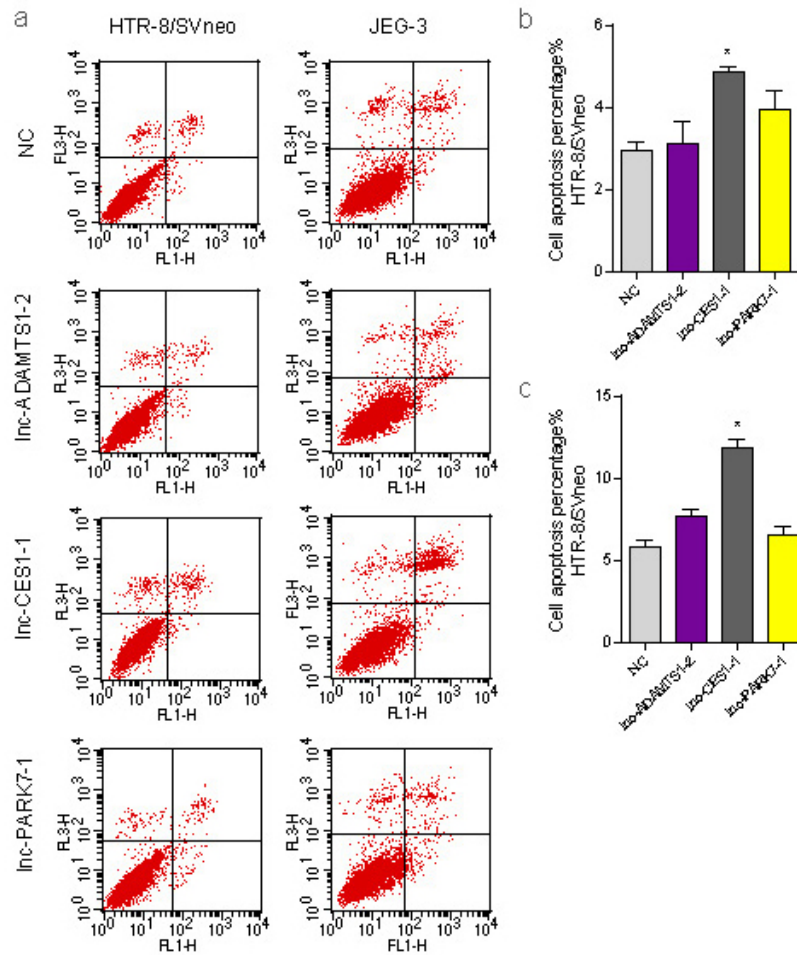



**Figure S5.** Cell cycle assay of HTR-8/SVneo and cells overexpressed

Inc-ADAMTS1-2 / Inc-CES1-1 / Inc-PARK7-1. \* $P < 0.05$ . Data are presented as

mean  $\pm$ SEM. Three repeats were set up for each treatment.

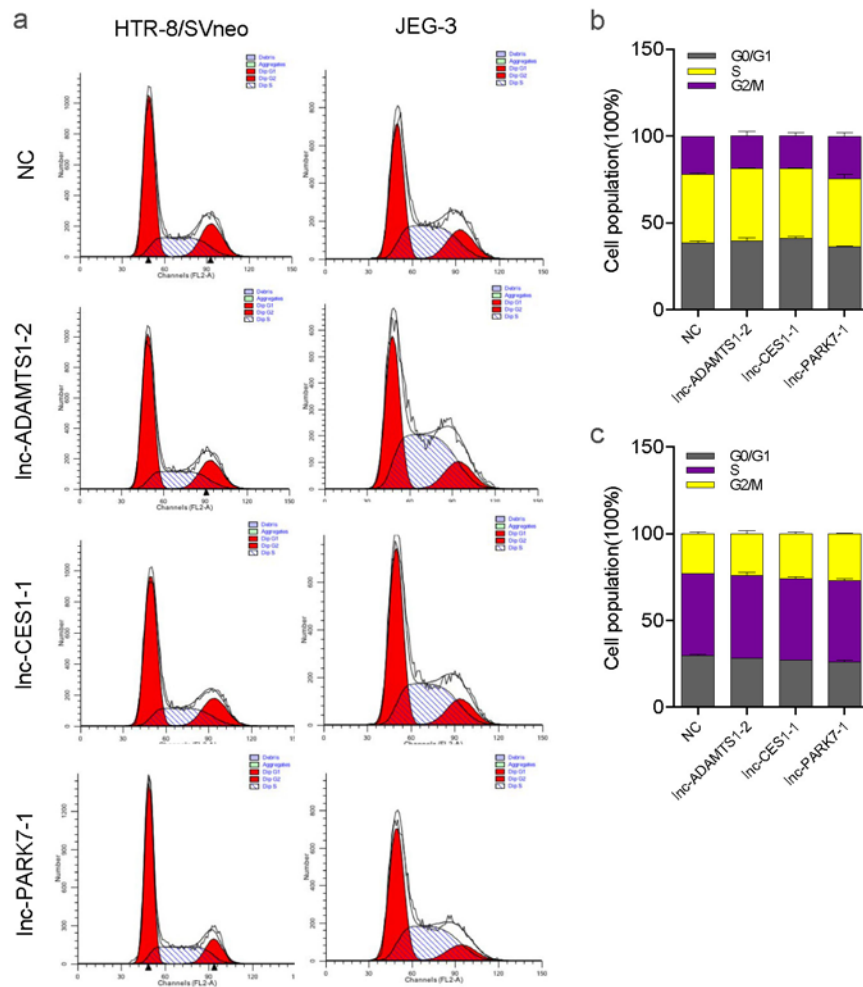

**Fig. S6.** Relative expression of knockdown *lnc-CES1-1* and *PPAR $\gamma$*  after transfection.

Transfection efficiency of (a) *lnc-CES1-1*, (c) *PPAR $\gamma$*  in HTR-8/SVneo, (b)

*lnc-CES1-1* and (d) *PPAR $\gamma$*  in JEG-3. \* $P < 0.05$ . Data are presented as mean  $\pm$ SEM.

Three repeats were set up for each treatment.

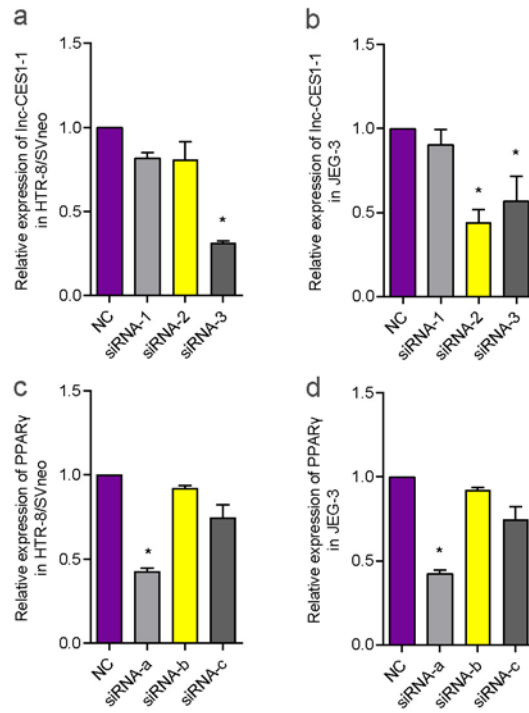

**Figure S7.** (a) RNA immunoprecipitation (RIP) followed by western blot with anti FUS to identify RNA binding protein. (b, c) Western blot of Smad3 in HTR-8/SVneo and JEG-3 cells of overexpressed lnc-CES1-1. (d, e) Western blot of FUS in HTR-8/SVneo and JEG-3 cells of overexpressed and knockdown PPAR $\gamma$ .

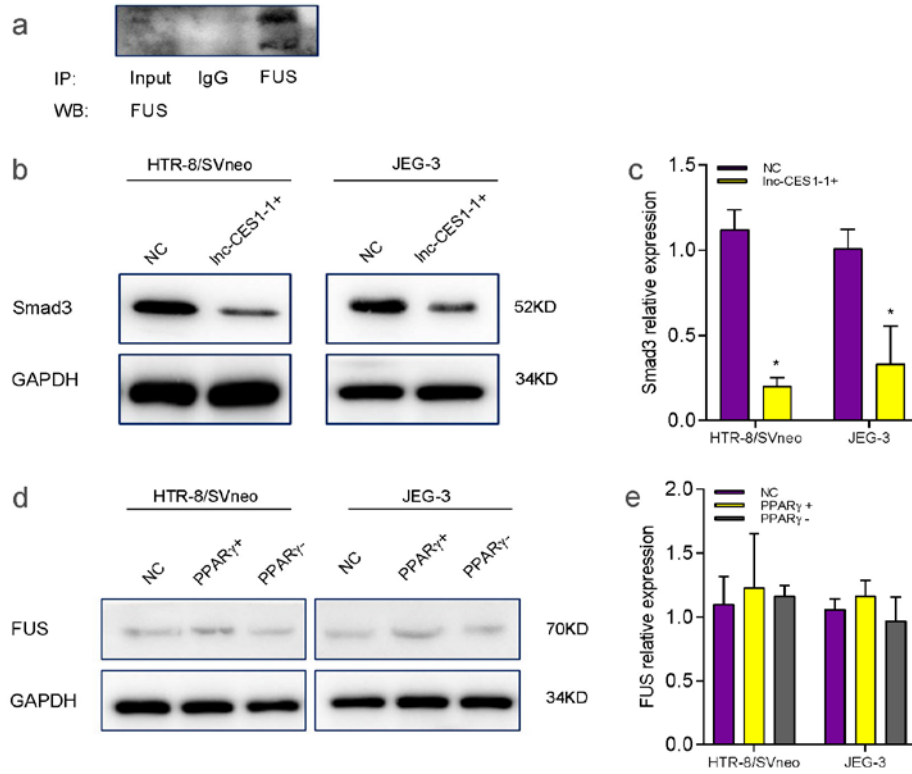

Supplement: mmc1.pdf [file mmc1.pdf]
