# Supplementary material for: Enhancer RNA lnc-CES1-1 inhibits decidual cell migration by interacting with RNA-binding protein FUS and activating PPARγ in URPL
Source: PubMed Central journal article supplement — Mol Ther Nucleic Acids. 2021 Feb 18;24:104–12. doi: 10.1016/j.omtn.2021.02.018 (PMC7941017; doi:10.1016/j.omtn.2021.02.018), 2021-02-18

# Enhancer RNA Inc-CES1-1 inhibits decidual cell migration by interacting with RNA-binding protein FUS and activating PPAR $\gamma$ in URPL

Zhenyao Huang,<sup>3,7</sup> Hao Yu,<sup>1,2,7</sup> Guizhen Du,<sup>1,2,7</sup> Li Han,<sup>4</sup> Xiaomin Huang,<sup>5</sup> Dan Wu,<sup>6</sup> Xiumei Han,<sup>1,2</sup> Yankai Xia,<sup>1,2</sup> Xinru Wang,<sup>1,2</sup> and Chuncheng Lu<sup>1,2</sup>

<sup>1</sup>State Key Laboratory of Reproductive Medicine, Institute of Toxicology, Nanjing Medical University, Nanjing 211166, China; <sup>2</sup>Key Laboratory of Modern Toxicology of Ministry of Education, School of Public Health, Nanjing Medical University, Nanjing 211166, China; <sup>3</sup>School of Public Health, Xuzhou Medical University, Xuzhou 221004, China; <sup>4</sup>Department of Obstetrics, Huai-An First Affiliated Hospital, Nanjing Medical University, Nanjing 211166, China; <sup>5</sup>Department of Cardio-Cerebrovascular Disease and Diabetes Prevention, Shenzhen Nanshan Center for Chronic Disease Control, Shenzhen 518000, China; <sup>6</sup>Department of Obstetrics and Gynecology, the First Affiliated Hospital of Nanjing Medical University, Nanjing 211166, China

**Unexplained recurrent pregnancy loss (URPL) is a significant reproductive health issue, affecting approximately 5% of pregnancies. Enhancer RNAs (eRNAs) have been reported to play important roles during embryo development and may be related to URPL. To investigate whether and how eRNAs are involved in URPL, we performed RNA sequencing in decidual tissue. Through comprehensive screening and validation, we identified a decidua-enriched eRNA long noncoding-CES1-1 (Inc-CES1-1) enriched in URPL patients and studied its function in decidua-associated cell lines (DACs). Higher expression of Inc-CES1-1 increased the level of inflammatory factors tumor necrosis factor alpha (TNF- $\alpha$ ) and interleukin-1 $\beta$  (IL-1 $\beta$ ) and impaired the cell migration ability, which was attenuated by downregulating peroxisome proliferators-activated receptor  $\gamma$  (PPAR $\gamma$ ). Upon activation by signal transduction and activation of transcription 4 (STAT4), Inc-CES1-1 interacted with the transcription factor fused in sarcoma (FUS) to upregulate the expression of PPAR $\gamma$  and affected cell migration. Taken together, these findings provide novel insights into the biological functions of decidua-associated Inc-CES1-1 and the molecular mechanisms underlying URPL. Our findings indicated that Inc-CES1-1 might be a potential candidate biomarker for URPL diagnosis and treatment.**

## INTRODUCTION

Recurrent pregnancy loss (RPL) refers to two or more consecutive pregnancy losses, affecting 2%–5% of couples.<sup>1</sup> Approximately 24.4% of RPL patients will suffer multiple miscarriages.<sup>2,3</sup> Known causes of RPL include abnormal chromosomes (chromosome inversion, deletion, duplication, etc.), endocrinological disorders (luteal insufficiency, Stein-Leventhal syndrome, etc.), and uterine abnormalities.<sup>4</sup> However, the causes of half of these cases remain poorly understood, and are termed unexplained RPL (URPL). During pregnancy, the endometrium undergoes decidualization to regulate trophoblast invasion and placental formation after implantation.<sup>5</sup> The decidua participates in the exchange of nutrition, gas, and waste during the gestation.<sup>6,7</sup>

More than 98% of the human genome consists of nonprotein coding regions,<sup>8,9</sup> and long noncoding RNAs (lncRNAs) are transcribed from these regions by RNA polymerase II (RNA Pol II) and are longer than 200 nucleotides. The functions of this class of stable transcripts have been widely studied, but not fully characterized.<sup>10</sup> Recent studies have suggested that lncRNAs are involved in embryonic development, differentiation, and numerous human diseases by regulating gene expression.<sup>11–16</sup> Enhancer RNAs (eRNAs) are a special class of lncRNAs that are transcribed from active enhancers with H3K4me1/H3K27ac marks.<sup>17–20</sup> Numerous studies have shown that eRNAs are important for gene regulation in embryonic development and disease.<sup>21,22</sup> Nitzan et al.<sup>23</sup> demonstrated that TES/TESCO was a crucial enhancer regulating Sox9 expression in gonads during sex determination. A specific isoform of an enhancer-associated lncRNA, named CARMEN-201, controls smooth-muscle lineage specification in a human cardiac precursor.<sup>24</sup> The eRNA ARIEL activates the oncogenic transcriptional program in T cell acute lymphoblastic leukemia.<sup>25</sup> These data suggested that eRNAs might play a regulatory role in the etiology of URPL.

In this study, we profiled the lncRNAs in decidual tissues of URPL patients and normal controls by RNA sequencing (RNA-seq). After multiple screening and validation steps, we discovered a decidua-enriched eRNA Inc-CES1-1 and identified its function *in vitro*. Mechanistically, the transcription factor signal transduction and activation of transcription 4 (STAT4) promoted the expression of Inc-CES1-1 with H3K27ac enrichment near the Inc-CES1-1 locus. Inc-CES1-1 interacted with

Received 24 June 2020; accepted 14 February 2021;  
<https://doi.org/10.1016/j.omtn.2021.02.018>.

<sup>7</sup>These authors contributed equally

**Correspondence:** Chuncheng Lu, MD, State Key Laboratory of Reproductive Medicine, Institute of Toxicology, Nanjing Medical University, Nanjing 211166, China.

**E-mail:** [chunchenglu@njmu.edu.cn](mailto:chunchenglu@njmu.edu.cn)

**Correspondence:** Xinru Wang, MD, State Key Laboratory of Reproductive Medicine, Institute of Toxicology, Nanjing Medical University, Nanjing 211166, China.

**E-mail:** [xrwang@njmu.edu.cn](mailto:xrwang@njmu.edu.cn)

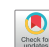

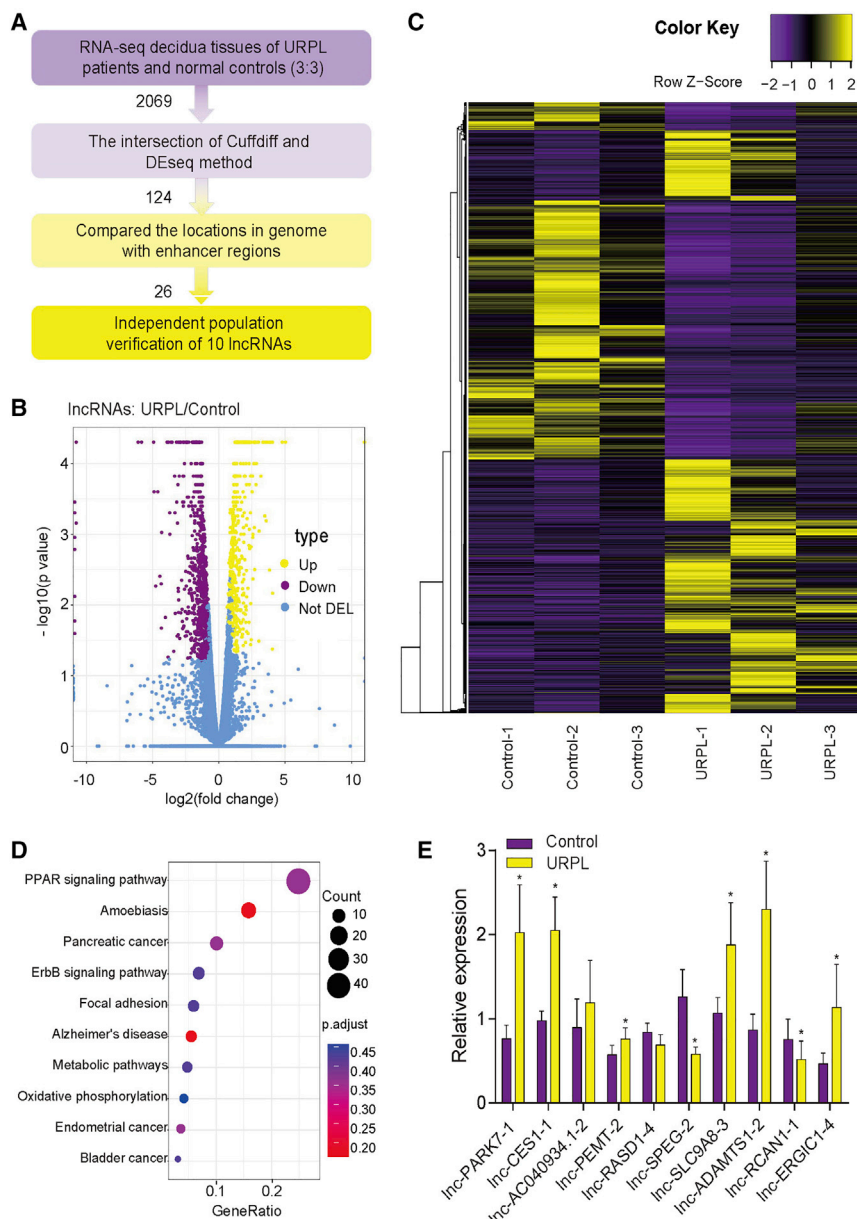

**Figure 1. Identification of decidual-associated eRNAs in URPL**

(A) The screening process used in this study. (B) Volcano plot of DELs between URPL and controls (N = 3 per group). (C) Hierarchical cluster of DELs (fold change > 2 or < 2; FDR < 0.05). (D) Top 10 KEGG pathways enriched in DELs. (E) qPCR validation of DELs (n = 20 per group). \*p < 0.05. Data are presented as the mean ± SEM.

(KEGG) pathway analysis indicated that the top pathways enriched in DELs were the PPAR signaling pathway, which was reported to be involved in URPL (Figure 1D).<sup>26</sup>

Among those DELs, 26 lncRNAs were identified as eRNAs after comparing their locations with annotated enhancer regions in the VISTA Enhancer Browser (<https://enhancer.lbl.gov/>). We validated these 10 eRNAs related to inflammation and immunization by qPCR in more URPL patients and controls (20:20) and the results were consistent with the sequencing results (Figure 1E). Among them, lnc-ADAMTS1-2/lnc-CES1-1/lnc-PARK7-1 were the most highly upregulated eRNAs. Therefore, we focused on them in the following study.

**eRNA lnc-CES1-1 regulated the functions of decidual-associated cells**

To further explore the functions of selected eRNA, we used decidual-associated cell lines (DACs: HTR-8/SVneo and JEG-3 cells) as models. First, we overexpressed three DELs in two cell lines and quantitative real-time PCR revealed the upregulation of lnc-ADAMTS1-2/lnc-CES1-1/lnc-PARK7-1 (Figure S2). Cell counting kit 8 (CCK-8) assays showed that only overexpression of lnc-CES1-1 could significantly inhibit cell proliferation and increase the cell apoptosis in DACs (Figures S3–S5). Then, we evaluated the effects of these eRNAs on cell

migration by Transwell assays. Only lnc-CES1-1 impaired cell migration ability (Figure 2). Overexpression of lnc-ADAMTS1-2 and lnc-PARK7-1 had limited impacts on DACs. Thus, we next focused on lnc-CES1-1.

**RESULTS**

**Identification of decidual enriched eRNAs in URPL**

We profiled the lncRNAs in decidual tissues from URPL patients and controls by RNA-seq (Figure S1). The data analysis pipeline is illustrated in Figure 1A. As shown in Figures 1B and 1C, 2,069 differentially expressed lncRNAs (DELs; 970 up- and 1,099 downregulated) were identified using 2-fold change and false discovery rate (FDR) < 5%. A total of 124 DELs were selected from the intersection of the Cuffdiff and DEseq results. Kyoto Encyclopedia of Genes and Genomes

migration by Transwell assays. Only lnc-CES1-1 impaired cell migration ability (Figure 2). Overexpression of lnc-ADAMTS1-2 and lnc-PARK7-1 had limited impacts on DACs. Thus, we next focused on lnc-CES1-1.

**lnc-CES1-1 did not act as a cis-element**

lnc-CES1-1 (<https://lncipedia.org/>) is located on chromosome 16 (chr16), has a full length of 553 bp, and contains 3 exons. To confirm the eRNA potency of lnc-CES1-1, we performed chromatin immunoprecipitation (ChIP)-qPCR at the lnc-CES1-1 transcription locus and detected enrichment of H3K27ac (Figure 3A). In addition, lnc-CES1-1 was mainly located within the nucleus. This suggested that

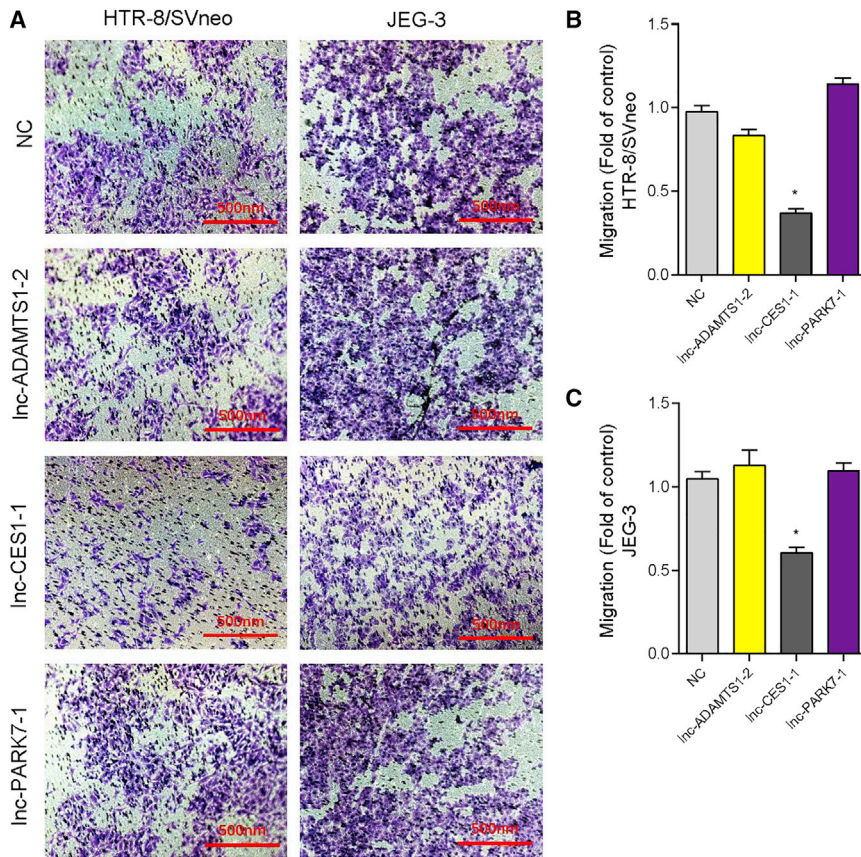

**Figure 2. Inc-CES1-1 inhibited cell migration**

(A) Transwell assay of overexpressed Inc-ADAMTS1-2/Inc-CES1-1/Inc-PARK7-1 in HTR-8/SVneo and JEG-3 cells. (B) The counts of migrated cells (fold of control) in HTR-8/SVneo cells. (C) The counts of migrated cells (fold of control) in JEG-3 cells. \* $p < 0.05$ . Data are presented as the mean  $\pm$  SEM.

nonprecipitation (RIP)-qPCR in HTR-8/SVneo cells, using antibodies directed against predicted proteins including RNA Pol II, FUS, ELF4B, and SFRS1 (Figure 3F). RNA Pol II and FUS-RIP resulted in the specific enrichment of co-precipitated Inc-CES1-1. IP western blots showed that the FUS antibody could enrich the target protein effectively (Figure S7A). RNA *in situ* hybridization proximity ligation assay (rISH-PLA) was used to better understand the binding of Inc-CES1-1 and FUS. As expected, a significant number of interactions were observed between Inc-CES1-1 and FUS (Figure 3G). The results indicated that FUS was functional as a direct binding partner of Inc-CES1-1.

#### Inc-CES1-1 regulated PPAR $\gamma$ in cell migration and inflammation

KEGG pathway analysis revealed that the PPAR pathway, which is one of a well-investigated signaling pathway activated during placental development, was enriched among DELs.<sup>30–32</sup> We measured three genes involved in the PPAR pathway (PPAR $\alpha$ , PPAR $\beta$ , and PPAR $\gamma$ ) in Inc-CES1-1-overexpressing or Inc-CES1-1-downregulated DACs (Figure 4A). Knockdown efficiency is shown in Figures S6A and S6B. The expression level of PPAR $\gamma$  was positively correlated with Inc-CES1-1. To further validate whether PPAR $\gamma$  was a direct target of the Inc-CES1-1/FUS complex, we performed RIP-qPCR and found that overexpression of Inc-CES1-1 led to an increase in PPAR $\gamma$  bound to the FUS protein (Figure 4B). We also found that the protein levels of PPAR $\gamma$  were positively correlated with Inc-CES1-1 (Figure 4C). In addition, neither overexpression nor knockdown of Inc-CES1-1 affected the levels of PPAR $\alpha$  and PPAR $\beta$  in DACs (Figure 4A). Confocal microscopy showed that Inc-CES1-1 increased the level of PPAR $\gamma$  and promoted the translocation of PPAR $\gamma$  from the nucleus to the cytoplasm, while knockdown of Inc-CES1-1 partially decreased the level of PPAR $\gamma$  and translocation (Figure 4D).

We next knocked down PPAR $\gamma$  to test whether PPAR $\gamma$  was involved in the cell migration impairment induced by Inc-CES1-1. PPAR $\gamma$  knockdown efficiency is shown in Figures S6C and S6D. Downregulation of PPAR $\gamma$  attenuated the cell

Inc-CES1-1 had the potential to interact with nuclear proteins to regulate gene expression (Figure 3B). Classical antisense transcripts preferentially control the expression of the nearby genes.<sup>27</sup> To check whether Inc-CES1-1 regulates gene expression in a *cis* manner, we detected CES1 expression in Inc-CES1-1 overexpressing cells. The results showed that Inc-CES1-1 did not act as a *cis*-element and might interact with distant genes (Figure 3C).

#### Inc-CES1-1 interacted with the RNA binding protein FUS

Previous studies demonstrated that eRNAs were regulated by transcription factors such as p53, AP1, and nuclear factor- $\kappa$ B (NF- $\kappa$ B).<sup>28,29</sup> To identify the potential regulators involved in Inc-CES1-1 expression, we first scanned for potential transcription-factor-binding sites in the Inc-CES1-1 promoter. Using JASPAR (<http://jaspar.genereg.net/>), we found that C/EBP, c-Jun-, and STAT4 binding sites were enriched in the promoter region of Inc-CES1-1. ChIP-qPCR showed that STAT4 directly bound to the Inc-CES1-1 promoter (Figure 3D). Knockdown of STAT4 decreased the expression level of Inc-CES1-1 (Figure 3E).

We then used PROMO ([http://algggen.lsi.upc.es/cgi-bin/promo\\_v3/promo/promoinit.cgi?dirDB=TF\\_8.3](http://algggen.lsi.upc.es/cgi-bin/promo_v3/promo/promoinit.cgi?dirDB=TF_8.3)) to predict RNA binding protein within Inc-CES1-1. Among the top enriched proteins, we identified FUS as a putative Inc-CES1-1-binding protein. To confirm the interaction between Inc-CES1-1 and FUS, we performed RNA immu-



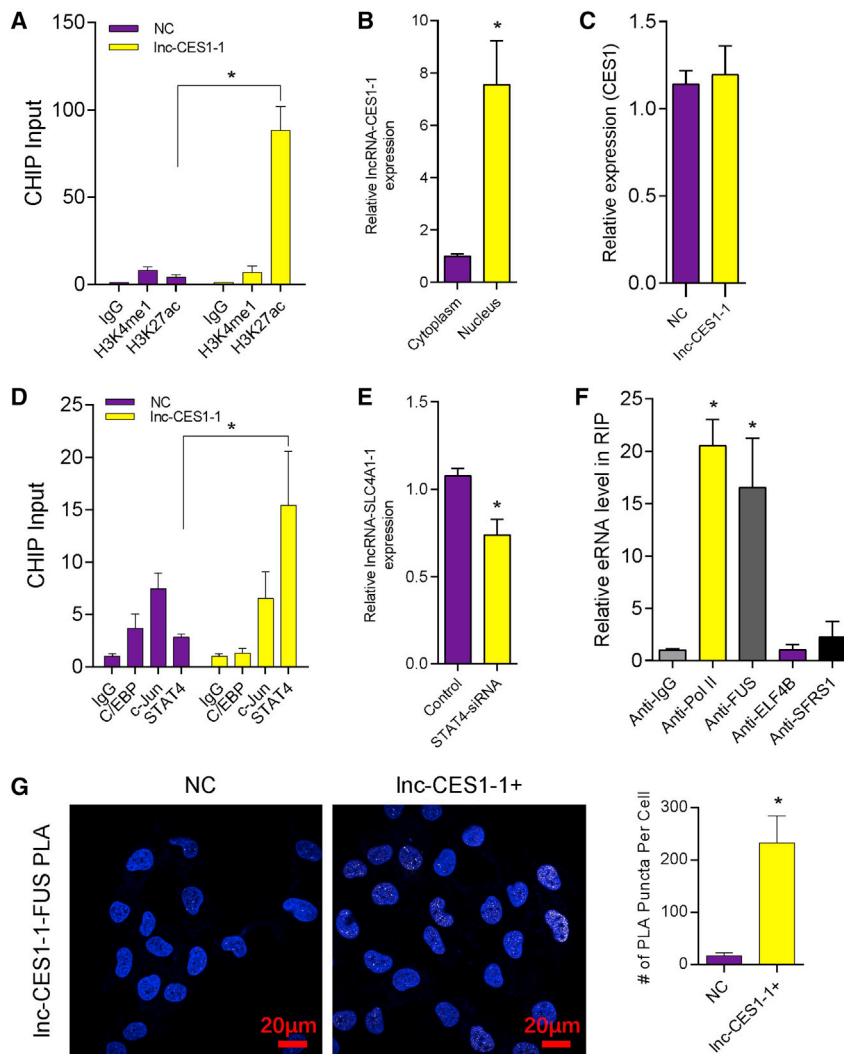

**Figure 3. Inc-CES1-1 did not act in a cis-regulatory manner**

(A) ChIP-qPCR analysis of H3K4me1 and H3K27ac enrichment near Inc-CES1-1. (B) The relative expression level of Inc-CES1-1 in the nuclei and cytoplasm. (C) Relative expression level of CES1 after Inc-CES1-1 overexpression. (D) ChIP-qPCR analysis of H3K4me1 and H3K27ac enrichment in HTR-8/SVneo cells. (E) Relative expression level of Inc-CES1-1 after knockdown of STAT4. (F) RNA immunoprecipitation (RIP) followed by quantitative real-time PCR to identify RNA binding proteins. (G) RNA *in situ* hybridization proximity ligation assay (riSH-PLA) of Inc-CES1-1 and FUS in HTR-8/SVneo cells. \**p* < 0.05. Results are presented as the mean ± SEM.

## DISCUSSION

Currently, the role of eRNAs in URPL is not well understood. Through multiple screening and validation steps, we identified an eRNA, called Inc-CES1-1, that was enriched in decidual tissue from URPL patients and elucidated the potential mechanisms of Inc-CES1-1 in URPL.

Higher expression of Inc-CES1-1 inhibited DAC migration and induced cell apoptosis and inflammation. Inc-CES1-1 can be activated by STAT4, which belongs to the STAT family and mediates the cytokine-induced development of cells into T helper 1 (Th1) or Th2 types.<sup>36,37</sup> Since Inc-CES1-1 was transcribed from the enhancer region, we first tested its putative *cis*-regulatory function. However, Inc-CES1-1 did not regulate CES1 expression, suggesting a *trans*-regulatory function of Inc-CES1-1. FUS was uncovered as Inc-CES1-1 interacting protein. FUS belongs to the FET family of proteins (FUS, EWS, and TAF15), which are involved in transcriptional regulation and RNA

processing.<sup>38</sup> Katarzyna et al.<sup>39</sup> revealed that FUS bound to histone genes in S phase, which was linked to the activity of histone gene promoters and recruitment of RNA Pol II. Lorenzo et al.<sup>40</sup> reported that FUS controlled back-splicing reactions leading to circular RNA (circRNA) production and participated in several RNA biosynthetic processes. FUS might serve as a linking factor that positively regulates gene transcription by interacting with RNA. Regarding the functional contribution of Inc-CES1-1 to this process, we confirmed the interaction between FUS and Inc-CES1-1 by RIP *in vitro*.

PPARγ is a subtype of PPAR that belongs to the nuclear hormone receptor superfamily, which is essential for placental formation during pregnancy and is highly expressed in pathological pregnancy.<sup>41</sup> As a decidual nutrient sensor, PPARγ is important for embryo viability and early placental and fetal development.<sup>42</sup> In this study, we found that PPARγ functions as an inhibitor of cell migration in DACs. During pregnancy, abnormal cell migration results in either inadequate

migration impairment caused by Inc-CES1-1 (Figures 5A–5C). Some studies reported that overexpressed PPARγ inhibited cell proliferation and migration by inhibiting Smad3.<sup>33,34</sup> Immunofluorescence (Figure 4D) and western blotting (Figures S7B and S7C) revealed that Smad3 was downregulated in Inc-CES1-1 overexpressing DACs. In addition, knockdown or overexpression of PPARγ did not change the expression of FUS (Figures S7D and S7E). These findings provide evidence that Inc-CES1-1 epigenetically regulates PPARγ expression by interfering with the RNA binding protein FUS. PPARγ was reported to activate inflammatory cascades,<sup>35</sup> and thus we also assessed whether activation PPARγ induced by Inc-CES1-1 could result in an inflammatory response. Treating DACs with a PPARγ antagonist decreased the levels of Inc-CES1-1-induced TNF-α and IL-1β (Figure 5D). All of these data suggested that PPARγ participated in Inc-CES1-1/FUS induced impairment of cell migration ability and inflammation.

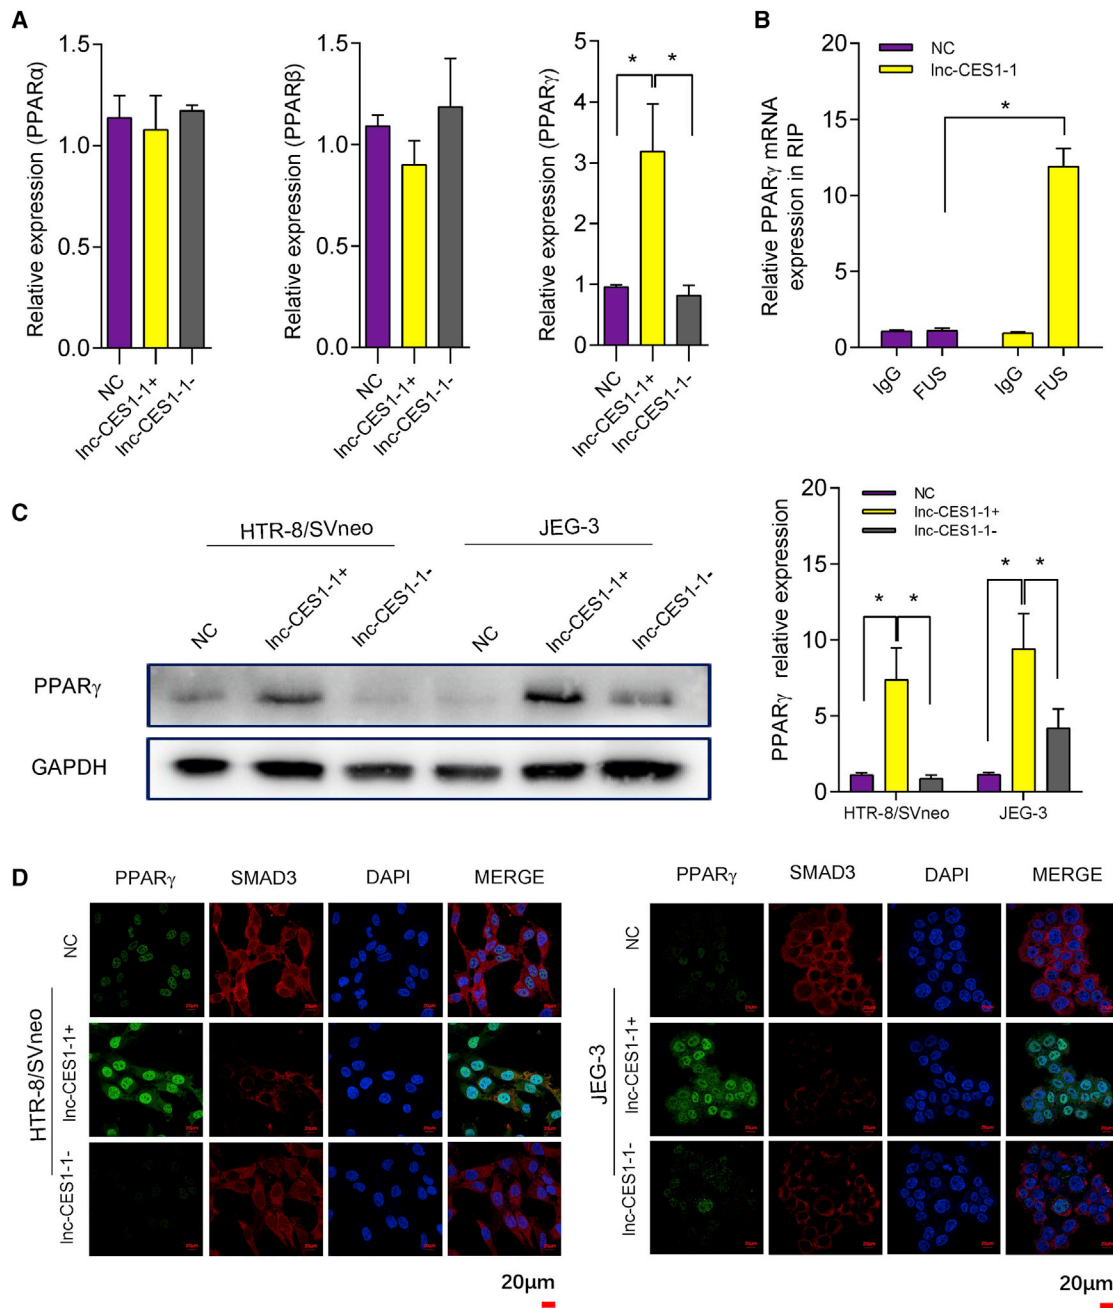

**Figure 4. Inc-CES1-1 regulated PPAR $\gamma$  function**

(A) Relative expression levels of PPAR $\alpha$ , PPAR $\beta$ , and PPAR $\gamma$  in Inc-CES1-1 overexpressing or Inc-CES1-1 downregulated cells. (B) The abundance of PPAR $\gamma$  mRNA bound with FUS in HTR-8/SVneo cells after overexpression of Inc-CES1-1. (C) Western blot of PPAR $\gamma$  in HTR-8/SVneo and JEG-3 cells under different conditions. (D) Immunofluorescence of PPAR $\gamma$  and Smad3 in HTR-8/SVneo and JEG-3 cells under different conditions (scale bar, 20  $\mu$ m). \* $p < 0.05$ . Data were shown as the mean  $\pm$  SEM.

(URPL, intrauterine growth restriction, and preeclampsia) or overzealous (placenta accrete and increta) placentation.<sup>43</sup> The inadequate migration of trophoblast cells causes placental implantation failure and accelerates the process of URPL. PPAR $\gamma$  is also an important protein in the activation of inflammatory cascades.<sup>35</sup> Sherief et al.<sup>44</sup> re-

ported that inflammatory cytokine levels were significantly higher in the placenta of women with pathological pregnancy than in women undergoing normal delivery at term. In our study, we also found that downregulated PPAR $\gamma$  attenuated the levels of the inflammatory factors TNF- $\alpha$  and IL-1 $\beta$  induced by Inc-CES1-1.

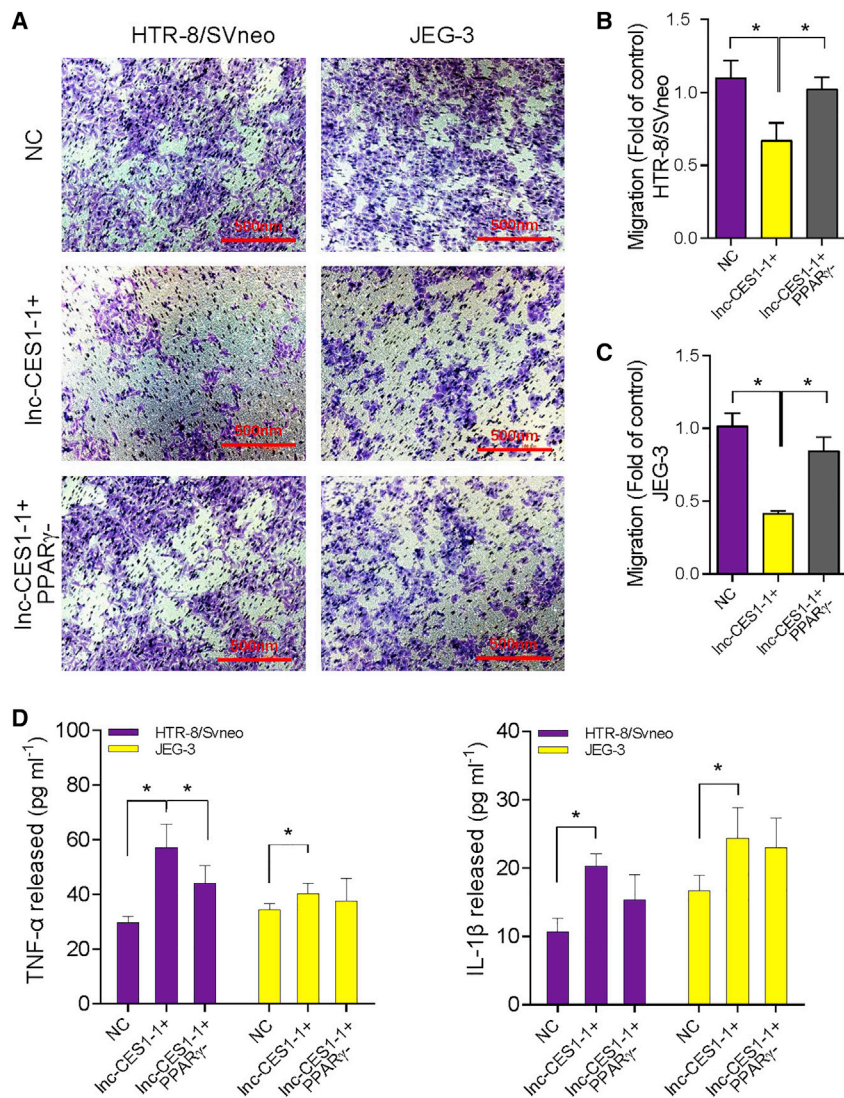

**Figure 5. Inc-CES1-1 regulated decidual-associated cell function through PPAR $\gamma$**

(A) Transwell assay of overexpressed and knocked down Inc-CES1-1 in HTR-8/SVneo and JEG-3 cells. (B) The counts of migrated cells (fold of control) in HTR-8/SVneo cells. (C) The counts of migrated cells (fold of control) in JEG-3 cells. (D) The levels of TNF- $\alpha$  and IL-1 $\beta$  in HTR-8/SVneo and JEG-3 cells under different conditions. \* $p < 0.05$ . Results are presented as the mean  $\pm$  SEM.

women who underwent legal termination of normal early pregnancy at the same hospital (N = 50). In this study, the criteria for early URPL were 2 or more consecutive pregnancy losses before 20 weeks of undetermined etiology. Abnormal embryonic chromosomes were excluded by karyotyping screening and array-comparative genomic hybridization (array-CGH) in the two groups. We also excluded patients with endocrine disorders, thyroid dysfunction, infection, or abnormal uterine anatomy. The two groups were matched for age, nulliparous times, and gestational weeks (clinical characteristics are consistent with previous studies).<sup>45</sup>

### RNA-seq

Briefly, decidual tissues from URPL patients and controls (3:3) were collected and lysed with RNeasy Kits (QIAGEN, Duesseldorf, Germany) according to the protocols. 1  $\mu$ g RNA was used for library preparation and sequenced on a HiSeq 2000 (Illumina, San Diego, USA). The sequencing reads were aligned to the human reference genome (hg19) using TopHat v1.4.1 with default settings. Differential gene expression (DEG) analysis was performed with Cuffdiff and DESeq.

### Quantitative real-time PCR

TRIzol reagent (Invitrogen, Carlsbad, USA) was used to extract the total RNA from decidual tissues. Quantitative real-time PCR was used to examine the expression levels of lncRNAs and genes. The primer sequences are listed in Table S1. Using SYBR green master mix (Vazyme, Nanjing, China), quantitative real-time PCR reactions were performed by the ABI Prism7900HT/FAST (Applied Biosystems, Foster City, USA). Gene expression was normalized to the internal control (glyceraldehyde-3-phosphate dehydrogenase [GAPDH]). For quantification, the relative CT method ( $2^{-\Delta\Delta Ct}$  method) was employed.

### Cell culture

HTR-8/SVneo cells were cultured in 1640 medium (GIBCO, Carlsbad, USA) containing 10% fetal calf serum (FCS; GIBCO, Carlsbad, USA) and 1% penicillin/streptomycin (GIBCO, Carlsbad, USA); JEG-3 cells were cultured in MEM (GIBCO, Carlsbad, USA) with

We provided evidence that decidual-associated lnc-CES1-1 is an eRNA that regulates decidual-associated cell functions through epigenetic mechanisms (Figure 6). Our findings indicate that lnc-CES1-1 plays crucial roles in the progression of URPL and suggest that lnc-CES1-1 may be a potential marker for URPL diagnosis and treatment.

## MATERIALS AND METHODS

### Decidua tissues

The Ethics Committee of Nanjing Medical University (NMU) reviewed and approved the research protocol (no. NMU [2016]132). Informed consent was obtained from all subjects in the study. All clinical specimens and data were coded and remained anonymous to the investigators in this study.

Decidual tissues were collected from cases in 2 groups: (1) the URPL group (N = 50) and (2) the control group, consisting of randomly selected



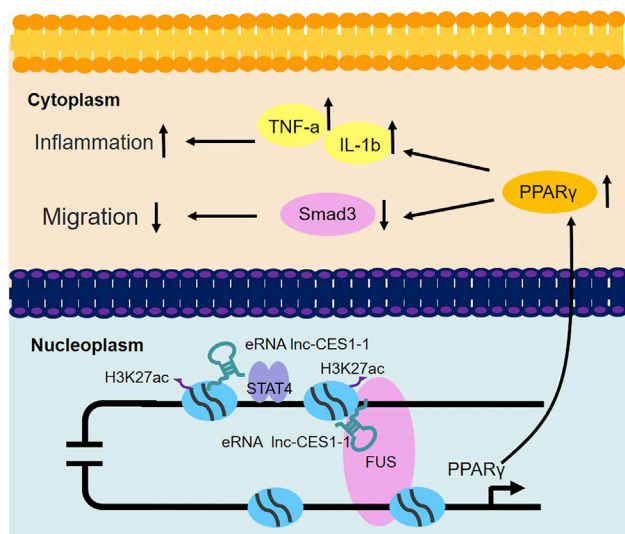

**Figure 6. Proposed working model**

Inc-CES1-1, which is activated by STAT4, binds to FUS to upregulate PPAR $\gamma$  to inhibit cell migration and expand the inflammatory response.

10% FCS and 1% penicillin/streptomycin. All cells tested negative for mycoplasma. Cells were transfected with pcDNA-lncRNAs or pcDNA-NC (negative control) for overexpression of lncRNAs. Cells were transfected with small interfering RNA (siRNA) to knock down Inc-CES1-1 or PPAR $\gamma$  expression using Lipofectamine 2000 (Invitrogen, Carlsbad, USA) according to the manufacturer's instructions. The best siRNA was selected according to the transfection efficiency from three candidate siRNAs. Based on the transfection efficiency, we selected siRNA-3 (Inc-CES1-1) and siRNA-a (PPAR $\gamma$ ) in the study (Figure S6).

#### Cell proliferation assay

Cell proliferation assays were performed with CCK-8 (Vazyme, Nanjing, China) according to the manufacturer's protocol. In brief, transfected cells were seeded in each well of a 96-well plate, treated with 10  $\mu$ L of CCK-8 solution in each well, and cultured for 0.5 h before measuring absorbance at 450 nm.

#### Cell migration assay

Transwell inserts with a pore size of 8  $\mu$ m (Millipore, Bedford, USA) were used for the cell migration assay. A total of  $5 \times 10^4$  cells were added to the inserts and allowed to migrate to the lower part of the chamber for 24 h at 37  $^{\circ}$ C in medium containing FCS in the lower chamber. Cells on the topside of the inserts were removed and migrated cells were fixed with methanol for 20 min and stained with crystal violet. The number of migrated cells was captured by fluorescence microscopy and five individual fields of view per Transwell were counted.

#### Cell cycle and apoptosis assay

Cell cycle and apoptosis assays were conducted by FACSCalibur Flow Cytometer (BD Medical Technology, Lake Franklin, USA) 24 h after

transfection as described before. Briefly, a single cell suspension was immobilized with 70% ethanol, and stained with propidium iodide (PI) for the cell-cycle assay. Single cell suspensions were stained with fluorescein isothiocyanate (FITC) Annexin V and PI for apoptosis assays.

#### Subcellular fractionation location

The separation of nuclear and cytosolic fractions was performed using the PARIS Kit (Invitrogen, Carlsbad, USA). According to the instructions, the kit is mainly used for the separation of nuclei and other parts (including cytoplasm and organelles). RNA extracted from each of the fractions was subjected to following quantitative real-time PCR analysis to demonstrate the levels of eRNA in the nucleus and cytoplasm (organelles included).

#### ChIP assays

ChIP experiments were performed using the MagnaChIP Kit (Millipore, Bedford, USA) according to the manufacturer's instructions. Chromatin was immunoprecipitated by incubation with 1  $\mu$ g antibody overnight (Table S2). Finally, after ChIP DNA was purified for quantitative real-time PCR. All the primer sequences used for ChIP-qPCR are listed in Table S1.

#### RIP

RIP experiments were performed using the Magna RIP RNA-Binding Protein Immunoprecipitation Kit (Millipore, Bedford, USA) according to the manufacturer's instructions. The antibodies used for RIP were applied in the amount of 5  $\mu$ g (Table S2). The precipitated RNAs were detected by quantitative real-time PCR. All primer sequences used for RIP-qPCR are listed in Table S1.

#### rISH-PLA

The main protocol was described in other studies.<sup>46,47</sup> The experiments were performed using Comprehensive Protein Analysis with Duolink PLA Products (Millipore, Bedford, USA) according to the manufacturer's instructions. Cells in a 96-well plate were fixed with 4% paraformaldehyde (PFA) and permeabilized with 70% ethanol overnight at 4  $^{\circ}$ C. Inc-CES1-1 was labeled prior to delivery with Dy-light-650 multiply labeled tetravalent RNA imaging probes. After the blocking step, whole-mount samples were incubated with rabbit anti-FUS (2  $\mu$ g/mL) antibodies overnight at 4  $^{\circ}$ C, followed by incubation with secondary antibodies conjugated with PLA probe at 37  $^{\circ}$ C for 2.5 h. Nuclei were stained using 4',6-diamidino-2-phenylindole (DAPI) (Sigma-Aldrich). Imaging was captured by laser scanning confocal microscopy (Carl Zeiss).

#### Western blot analysis

Western blotting was performed according to standard protocols as described previously.<sup>45</sup> The antibodies used in the study are listed in Table S2.

#### Immunofluorescence

A total of  $5 \times 10^4$  cells were seeded into each 35 mm dish. After transfection for 24 h, cells were fixed using 4% PFA and permeabilized with

0.1% Triton X –100. After blocking with goat serum, primary antibodies (Table S2) were incubated overnight at 4 °C. Secondary antibodies were incubated for 1 h at room temperature and nuclei were stained using DAPI (Sigma-Aldrich). Imaging was captured by laser scanning confocal microscopy (Carl Zeiss).

### ELISA

TNF- $\alpha$  and IL-1 $\beta$  in culture supernatants were analyzed by enzyme-linked immunosorbent assay (ELISA) with an Elabscience ELISA kit (Elabscience, Wuhan, China).

### Statistical analysis

All statistical analyses were performed with SPSS 18.0 (IBM, Armonk, NY, USA). Data are expressed as the mean  $\pm$  SEM and statistical significance was tested by two-tailed Student's t test and Mann-Whitney U test.  $p < 0.05$  was considered significant. N refers to the number of replicates.

### Data availability statement

RNA-seq data that support the findings of this study have been deposited in GEO: GSE113600. The authors declare that all data supporting the findings of this study are available within the article and its [Supplemental information](#).

### SUPPLEMENTAL INFORMATION

Supplemental information can be found online at <https://doi.org/10.1016/j.omtn.2021.02.018>.

### ACKNOWLEDGMENTS

This work was supported by The National Natural Science Foundation of China (81671461, 81973080, and 81630085), Natural Science Foundation of Jiangsu Province of China (BK20181366), and Priority Academic Program for the Development of Jiangsu Higher Education Institutions (Public Health and Preventive Medicine). Funders had no roles in the study design, data collection, data analysis, interpretation, or writing of the report.

### AUTHOR CONTRIBUTIONS

C.L. and X.W. directed the study, obtained financial support, and were responsible for the study design. Z.H. performed overall project management along with G.D. and Xiaomin Huang, drafted the initial manuscript, and performed statistical analysis. L.H. was responsible for sample collection and processing. H.Y. was responsible for population screening and verification. D.W. and Xiumei Han were responsible for functional analysis in HTR-8/SVneo and JEG-3 cells. Y.X. conceived of the study, participated in its design and coordination, and helped draft the manuscript. All authors read and approved the final manuscript.

### DECLARATION OF INTERESTS

The authors declare no competing interests.

### REFERENCES

- Bahia, W., Finan, R.R., Al-Mutawa, M., Haddad, A., Soua, A., Janhani, F., Mahjoub, T., and Almawi, W.Y. (2018). Genetic variation in the progesterone receptor gene and susceptibility to recurrent pregnancy loss: a case-control study. *BJOG* 125, 729–735.
- Elbareg, A., Essadi, F., Elmehashi, M., Anwar, K., and Adam, I. (2014). Hysteroscopy in Libyan women with recurrent pregnancy loss. *Sudan Journal of Medical Sciences* 9, 239–244.
- Chen, J.-L., Yang, J.-M., Huang, Y.-Z., and Li, Y. (2016). Clinical observation of lymphocyte active immunotherapy in 380 patients with unexplained recurrent spontaneous abortion. *Int. Immunopharmacol.* 40, 347–350.
- Garrido-Gimenez, C., and Alijotas-Reig, J. (2015). Recurrent miscarriage: causes, evaluation and management. *Postgrad. Med. J.* 91, 151–162.
- Kam, E.P.Y., Gardner, L., Loke, Y.W., and King, A. (1999). The role of trophoblast in the physiological change in decidual spiral arteries. *Hum. Reprod.* 14, 2131–2138.
- Edmondson, N., Bocking, A., Machin, G., Rizek, R., Watson, C., and Keating, S. (2009). The prevalence of chronic deciduitis in cases of preterm labor without clinical chorioamnionitis. *Pediatr. Dev. Pathol.* 12, 16–21.
- Yu, M., Du, G., Xu, Q., Huang, Z., Huang, X., Qin, Y., Han, L., Fan, Y., Zhang, Y., Han, X., et al. (2018). Integrated analysis of DNA methylome and transcriptome identified CREB5 as a novel risk gene contributing to recurrent pregnancy loss. *EBioMedicine* 35, 334–344.
- Ulitsky, I., and Bartel, D.P. (2013). lincRNAs: genomics, evolution, and mechanisms. *Cell* 154, 26–46.
- Esteller, M. (2011). Non-coding RNAs in human disease. *Nat. Rev. Genet.* 12, 861–874.
- Dinger, M.E., Pang, K.C., Mercer, T.R., and Mattick, J.S. (2008). Differentiating protein-coding and noncoding RNA: challenges and ambiguities. *PLoS Comput. Biol.* 4, e1000176.
- Wilusz, J.E., Sunwoo, H., and Spector, D.L. (2009). Long noncoding RNAs: functional surprises from the RNA world. *Genes Dev.* 23, 1494–1504.
- Taft, R.J., Pang, K.C., Mercer, T.R., Dinger, M., and Mattick, J.S. (2010). Non-coding RNAs: regulators of disease. *J. Pathol.* 220, 126–139.
- Huarte, M., and Rinn, J.L. (2010). Large non-coding RNAs: missing links in cancer? *Hum. Mol. Genet.* 19 (R2), R152–R161.
- Guttman, M., Donaghey, J., Carey, B.W., Garber, M., Grenier, J.K., Munson, G., Young, G., Lucas, A.B., Ach, R., Bruhn, L., et al. (2011). lincRNAs act in the circuitry controlling pluripotency and differentiation. *Nature* 477, 295–300.
- Fatica, A., and Bozzoni, I. (2014). Long non-coding RNAs: new players in cell differentiation and development. *Nat. Rev. Genet.* 15, 7–21.
- Nakagawa, S., and Kageyama, Y. (2014). Nuclear lincRNAs as epigenetic regulators—Beyond skepticism. *Biochimica et Biophysica Acta (BBA) - Gene Regulatory Mechanisms.* 1839, 215–222.
- Andersson, R., Gebhard, C., Miguel-Escalada, I., Hoof, I., Bornholdt, J., Boyd, M., Chen, Y., Zhao, X., Schmid, C., Suzuki, T., et al. (2014). An atlas of active enhancers across human cell types and tissues. *Nature* 507, 455–461.
- Ilott, N.E., Heward, J.A., Roux, B., Tsitsiou, E., Fenwick, P.S., Lenzi, L., Goodhead, I., Hertz-Fowler, C., Heger, A., Hall, N., et al. (2014). Long non-coding RNAs and enhancer RNAs regulate the lipopolysaccharide-induced inflammatory response in human monocytes. *Nat. Commun.* 5, 3979.
- Dorigi, K.M., Swigut, T., Henriques, T., Bhanu, N.V., Scruggs, B.S., Nady, N., Still, C.D., 2nd, Garcia, B.A., Adelman, K., and Wysocka, J. (2017). Mll3 and Mll4 Facilitate Enhancer RNA Synthesis and Transcription from Promoters Independently of H3K4 Monomethylation. *Mol. Cell* 66, 568–576.e4.
- Koenecke, N., Johnston, J., He, Q., Meier, S., and Zeitlinger, J. (2017). Drosophila poised enhancers are generated during tissue patterning with the help of repression. *Genome Res.* 27, 64–74.
- Cusanovich, D.A., Reddington, J.P., Garfield, D.A., Daza, R.M., Aghamirzaie, D., Marco-Ferrerres, R., Pliner, H.A., Christiansen, L., Qiu, X., Steemers, F.J., et al. (2018). The cis-regulatory dynamics of embryonic development at single-cell resolution. *Nature* 555, 538–542.



22. Wang, Q., Zou, Y., Nowotwschin, S., Kim, S.Y., Li, Q.V., Soh, C.-L., Su, J., Zhang, C., Shu, W., Xi, Q., et al. (2017). The p53 Family Coordinates Wnt and Nodal Inputs in Mesendodermal Differentiation of Embryonic Stem Cells. *Cell Stem Cell* 20, 70–86.
23. Gonen, N., Quinn, A., O'Neill, H.C., Koopman, P., and Lovell-Badge, R. (2017). Normal levels of Sox9 expression in the developing mouse testis depend on the TES/TESCO enhancer, but this does not act alone. *PLoS Genet.* 13, e1006520.
24. Plaisance, I., Nemir, M., Silakhor, P.A., Chouvardas, P., de los Reyes, S., Khalil, H., Johnson, R., and Pedrazzini, T. (2020). CARMEN-201, a specific isoform of an enhancer-associated long noncoding RNA controls smooth-muscle lineage specification in human cardiac precursor. *Cytotherapy* 22, S64.
25. Tan, S.H., Leong, W.Z., Ngoc, P.C.T., Tan, T.K., Bertulfo, F.C., Lim, M.C., An, O., Li, Z., Yeoh, A.E.J., and Fullwood, M.J. (2019). The enhancer RNA ARIEL activates the oncogenic transcriptional program in T-cell acute lymphoblastic leukemia. *Blood* 134, 239–251.
26. Meng, L., Lin, J., Chen, L., Wang, Z., Liu, M., Liu, Y., Chen, X., Zhu, L., Chen, H., and Zhang, J. (2016). Effectiveness and potential mechanisms of intralipid in treating unexplained recurrent spontaneous abortion. *Arch. Gynecol. Obstet.* 294, 29–39.
27. Zhang, C.-L., Zhu, K.-P., and Ma, X.-L. (2017). Antisense lncRNA FOXC2-AS1 promotes doxorubicin resistance in osteosarcoma by increasing the expression of FOXC2. *Cancer Lett.* 396, 66–75.
28. Melo, C.A., Drost, J., Wijchers, P.J., van de Werken, H., de Wit, E., Oude Vrielink, J.A., Elkon, R., Melo, S.A., Léveillé, N., Kalluri, R., et al. (2013). eRNAs are required for p53-dependent enhancer activity and gene transcription. *Mol. Cell* 49, 524–535.
29. Heward, J.A., Roux, B.T., and Lindsay, M.A. (2015). Divergent signalling pathways regulate lipopolysaccharide-induced eRNA expression in human monocytic THP1 cells. *FEBS Lett.* 589, 396–406.
30. Barak, Y., Sadovsky, Y., and Shalom-Barak, T. (2008). PPAR signaling in placental development and function. *PPAR Res.* 2008, 142082.
31. Fournier, T., Tsatsaris, V., Handschuh, K., and Evain-Brion, D. (2007). PPARs and the placenta. *Placenta* 28, 65–76.
32. Asami-Miyagishi, R., Iseki, S., Usui, M., Uchida, K., Kubo, H., and Morita, I. (2004). Expression and function of PPARgamma in rat placental development. *Biochem. Biophys. Res. Commun.* 315, 497–501.
33. Reka, A.K., Kurapati, H., Narala, V.R., Bommer, G., Chen, J., Standiford, T.J., and Keshamouni, V.G. (2010). Peroxisome proliferator-activated receptor- $\gamma$  activation inhibits tumor metastasis by antagonizing Smad3-mediated epithelial-mesenchymal transition. *Mol. Cancer Ther.* 9, 3221–3232.
34. Dantas, A.T., Pereira, M.C., de Melo Rego, M.J.B., da Rocha, L.F., Pitta, I.d.R., Marques, C.D.L., Duarte, A.L.B.P., and Pitta, M.G.d.R. (2015). The role of PPAR gamma in systemic sclerosis. *PPAR Res.* 2015, 124624.
35. Kelly, D., Campbell, J.I., King, T.P., Grant, G., Jansson, E.A., Coutts, A.G., Pettersson, S., and Conway, S. (2004). Commensal anaerobic gut bacteria attenuate inflammation by regulating nuclear-cytoplasmic shuttling of PPAR- $\gamma$  and RelA. *Nat. Immunol.* 5, 104–112.
36. Huda, N., Hosen, M.I., Yasmin, T., Sarkar, P.K., Hasan, A.K.M.M., and Nabi, A.H.M.N. (2018). Genetic variation of the transcription factor GATA3, not STAT4, is associated with the risk of type 2 diabetes in the Bangladeshi population. *PLoS ONE* 13, e0198507.
37. McWilliams, I.L., Rajbhandari, R., Nozell, S., Benveniste, E., and Harrington, L.E. (2015). STAT4 controls GM-CSF production by both Th1 and Th17 cells during EAE. *J. Neuroinflammation* 12, 128.
38. Blechinger, J., Luo, Y., Bolund, L., Damgaard, C.K., and Nielsen, A.L. (2012). Gene expression responses to FUS, EWS, and TAF15 reduction and stress granule sequestration analyses identifies FET-protein non-redundant functions. *PLoS ONE* 7, e46251.
39. Raczyńska, K.D., Ruepp, M.-D., Brzek, A., Reber, S., Romeo, V., Rindlisbacher, B., Heller, M., Szweykowska-Kulinska, Z., Jarmolowski, A., and Schümperli, D. (2015). FUS/TLS contributes to replication-dependent histone gene expression by interaction with U7 snRNPs and histone-specific transcription factors. *Nucleic Acids Res.* 43, 9711–9728.
40. Errichelli, L., Dini Modigliani, S., Laneve, P., Colantoni, A., Legnini, I., Capauto, D., Rosa, A., De Santis, R., Scarfò, R., Peruzzi, G., et al. (2017). FUS affects circular RNA expression in murine embryonic stem cell-derived motor neurons. *Nat. Commun.* 8, 14741.
41. Giaginis, C., Spanopoulou, E., and Theocharis, S. (2008). PPAR- $\gamma$  signaling pathway in placental development and function: a potential therapeutic target in the treatment of gestational diseases. *Expert Opin. Ther. Targets* 12, 1049–1063.
42. Roberti, S.L., Higa, R., White, V., Powell, T.L., Jansson, T., and Jawerbaum, A. (2018). Critical role of mTOR, PPAR $\gamma$  and PPAR $\delta$  signaling in regulating early pregnancy decidual function, embryo viability and feto-placental growth. *Mol. Hum. Reprod.* 24, 327–340.
43. Tilburgs, T., Roelen, D.L., van der Mast, B.J., de Groot-Swings, G.M., Kleijburg, C., Scherjon, S.A., and Claas, F.H. (2008). Evidence for a selective migration of fetus-specific CD4+CD25bright regulatory T cells from the peripheral blood to the decidua in human pregnancy. *J. Immunol.* 180, 5737–5745.
44. El-Shazly, S., Makhseed, M., Azizieh, F., and Raghupathy, R. (2004). Increased expression of pro-inflammatory cytokines in placentas of women undergoing spontaneous preterm delivery or premature rupture of membranes. *Am. J. Reprod. Immunol.* 52, 45–52.
45. Huang, Z., Du, G., Huang, X., Han, L., Han, X., Xu, B., Zhang, Y., Yu, M., Qin, Y., Xia, Y., et al. (2018). The enhancer RNA lnc-SLC4A1-1 epigenetically regulates unexplained recurrent pregnancy loss (URPL) by activating CXCL8 and NF- $\kappa$ B pathway. *EBioMedicine* 38, 162–170.
46. Roussis, I.M., Guille, M., Myers, F.A., and Scarlett, G.P. (2016). RNA Whole-Mount in situ hybridisation proximity ligation assay (rISH-PLA), an assay for detecting RNA-Protein complexes in intact cells. *PLoS ONE* 11, e0147967.
47. Blanchard, E.L., Argyropoulou, D., Zurla, C., Bhosle, S.M., Vanover, D., and Santangelo, P.J. (2019). Quantification and Localization of Protein-RNA Interactions in Patient-Derived Archival Tumor Tissue. *Cancer Res.* 79, 5418–5431.

**Supplemental information**

**Enhancer RNA Inc-CES1-1 inhibits decidual  
cell migration by interacting with RNA-binding  
protein FUS and activating PPAR $\gamma$  in URPL**

**Zhenyao Huang, Hao Yu, Guizhen Du, Li Han, Xiaomin Huang, Dan Wu, Xiumei Han, Yankai Xia, Xinru Wang, and Chuncheng Lu**

**Table S1.** Primers for real time qPCR.

| Gene              |         | Sequences of primers (5'-3') |
|-------------------|---------|------------------------------|
| GAPDH             | forward | TGTGGGCATCAATGGATTTGG        |
|                   | reverse | ACACCATGTATTCCGGGTCAAT       |
| lnc-PARK7-1       | forward | ACCATCACCTTAATGGGCTAGA       |
|                   | reverse | TTATGGAACTATGGCACGGTTT       |
| lnc-CES1-1        | forward | ACACCTATGCACCGGCAAC          |
|                   | reverse | TTAGCAGCATTCTTGATGTGTG       |
| lnc-AC040934.1-2  | forward | CCATGAAGGTGTTAAAGGGAAG       |
|                   | reverse | GCAGGATGTAGGGATAGGTTTG       |
| lnc-PEMT-2        | forward | CCACAAGAGGAGCTGATTGAG        |
|                   | reverse | CCTTTATTGGTGAATGGGAATG       |
| lnc-RASD1-4       | forward | GTCATCACCATCACCTTCAATC       |
|                   | reverse | CAGTGCAAAGAAGCTGGAGAG        |
| lnc-SPEG-2        | forward | CTAGGGCTCTGCCCAATGT          |
|                   | reverse | TCATCACCGTCTTCTTGGTATG       |
| lnc-SLC9A8-3      | forward | AAGGCATAGCCAACATGCTAAT       |
|                   | reverse | GGAAGATAGAACAGGCAGCATC       |
| lnc-ADAMTS1-2     | forward | CCCTCATCCTGTAAGGTACTGC       |
|                   | reverse | CAGTCGGTCACGAAAGATGTTA       |
| lnc-RCAN1-1       | forward | GGATGGAAACAAGTGGAAAGATG      |
|                   | reverse | TCTTTACCCAGGTTCTTGCATT       |
| lnc-ERGIC1-4      | forward | ATGTCCTCCACAATGTTAGCAA       |
|                   | reverse | TCTCGAACTCCTGACCTATCTTT      |
| CES1              | forward | ACCCCTGAGGTTTACTCCACC        |
|                   | reverse | TGCACATAGGAGGGTACGAGG        |
| STAT4             | forward | TGTTGGCCCAATGGATTGAAA        |
|                   | reverse | GGAAACACGACCTAACTGTTTCAT     |
| lnc-CES1-1 (ChIP) | forward | CACCCAAGATCCCAAGGCG          |
|                   | reverse | CACCACGTTTTTCATGGGCAG        |
| lnc-CES1-1 (ChIP) | forward | CTTCAGCACAGGGGATGAACA        |
|                   | reverse | ATCACCTTTCTTACCAGAACAG       |
| lnc-CES1-1 (ChIP) | forward | AATGGGCTCGACCAGCTTC          |
|                   | reverse | AGGTGACTCTTTCTAGCATGTGA      |
| lnc-CES1-1 (RIP)  | forward | CTAGGTCCGCTGCGATTTG          |
|                   | reverse | TGAGGTCCCTGTAGACACATGG       |
| lnc-CES1-1 (RIP)  | forward | GACCTTCCCTTCCGACTCCAT        |
|                   | reverse | CGGCAGGTTAGAGCCTTCA          |
| lnc-CES1-1 (RIP)  | forward | CATGGCTTCCTTGTATGATGGT       |



|               |         |                         |
|---------------|---------|-------------------------|
| PPAR $\alpha$ | reverse | CTCAAAGTGGGCGATATTCTG   |
|               | forward | ATGGTGGACACGGAAAGCC     |
| PPAR $\beta$  | reverse | CGATGGATTGCGAAATCTCTTGG |
|               | forward | CAGGCGATGGTGCAACTCATA   |
| PPAR $\gamma$ | reverse | CAGAGCACGTCTTGAGCCA     |
|               | forward | GATGCCAGCGACTTTGACTC    |
|               | reverse | ACCCACGTCATCTTCAGGGA    |

---

**Table S2.** Antibodies for western blot, ChIP, RIP and immunofluorescence.

| Antibodies                       | RRID        | Source                                  |
|----------------------------------|-------------|-----------------------------------------|
| GAPDH (WB1:1000)                 | AB_2715590  | Beyotime Biotechnology, Shanghai, China |
| IgG (ChIP/RIP)                   | AB_97842    | Millipore, Bedford, USA                 |
| H3K4me1 (ChIP)                   | AB_310614   | Millipore, Bedford, USA                 |
| H3K27ac (ChIP)                   | AB_2118291  | Abcam, Cambridge, UK                    |
| CBP (ChIP)                       | AB_2616020  | Cell Signaling Technology, Beverly, USA |
| c-Jun (ChIP)                     | AB_2798752  | Cell Signaling Technology, Beverly, USA |
| STAT4 (ChIP)                     | AB_2255156  | Cell Signaling Technology, Beverly, USA |
| RNA Pol II (RIP)                 | AB_1977470  | Millipore, Bedford, USA                 |
| FUS/TLS (ChIP/RIP)               | AB_11178670 | Cell Signaling Technology, Beverly, USA |
| ELF4b (RIP)                      | AB_1640424  | Abcam, Cambridge, UK                    |
| SF2/ASF(RIP)                     | AB_2798641  | Cell Signaling Technology, Beverly, USA |
| PPAR $\gamma$ (WB1:1000/IF1:100) | AB_2800240  | Cell Signaling Technology, Beverly, USA |
| SMAD3(WB1:1000/IF1:100)          | AB_2193182  | Cell Signaling Technology, Beverly, USA |

**Fig. S1. (a)** Principal component analysis. **(b)** Visualized box plot for compare the distributions of expression values for the samples after normalization. **(c)** Express (FPKM scores) distribution. **(d)** Correlation of each RNA-seq sample with the mean of all samples.

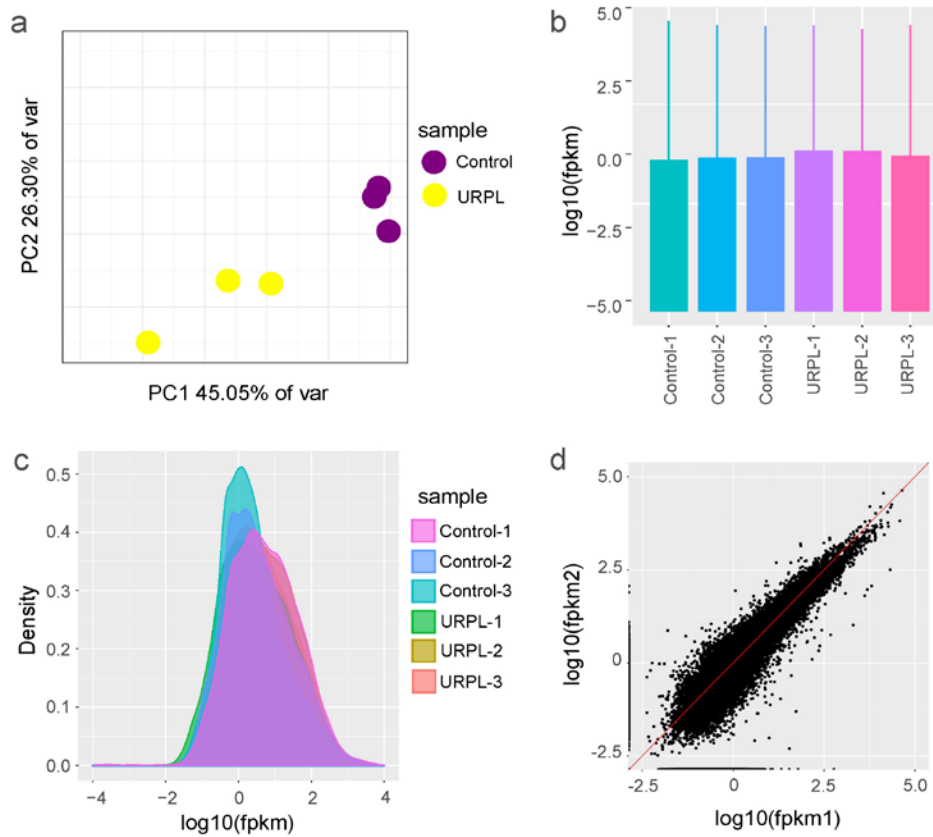



**Fig. S2.** Relative expression of the overexpressed lncRNA after transfection.

Transfection efficiency of **(a)** lnc-ADAMTS1-2, **(b)** lnc-CES1-1 and **(c)**

lnc-PARK7-1 in HTR-8/SVneo, **(d)** lnc-ADAMTS1-2, **(e)** lnc-CES1-1 and **(f)**

lnc-PARK7-1 in JEG-3. \* $P < 0.05$ . Data are presented as mean  $\pm$  SEM. Three repeats

were set up for each treatment.

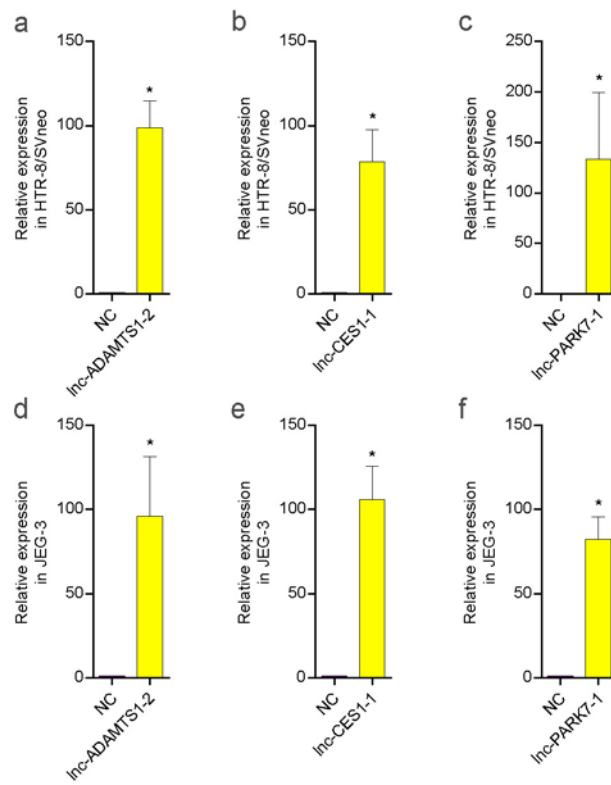

**Figure S3.** Cell proliferation analysis of HTR-8/SVneo of JEG-3 cells at 24h and 48h.

\* $P < 0.05$ . Data are presented as mean  $\pm$ SEM. Three repeats were set up for each treatment.

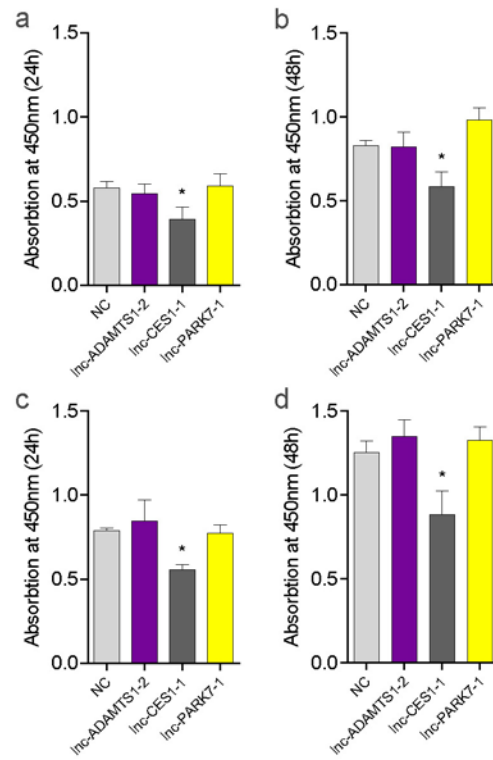

**Figure S4.** Cell apoptosis assay of HTR-8/SVneo and cells overexpressed Inc-ADAMTS1-2 / Inc-CES1-1 / Inc-PARK7-1. \* $P < 0.05$ . Data are presented as mean  $\pm$ SEM. Three repeats were set up for each treatment.

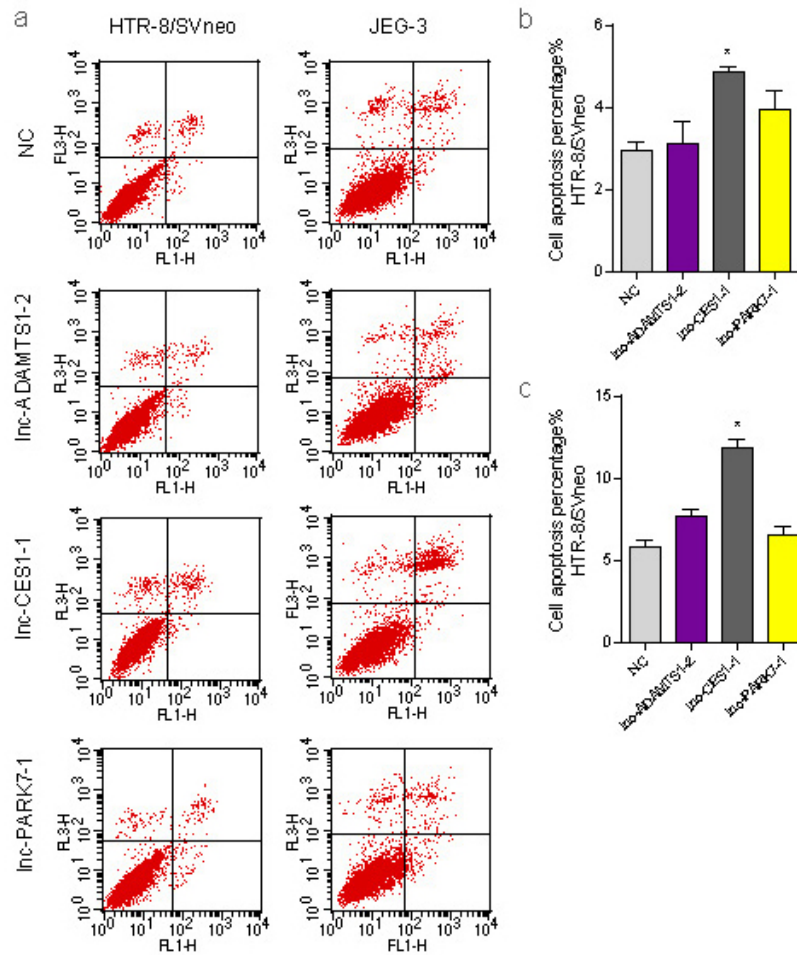



**Figure S5.** Cell cycle assay of HTR-8/SVneo and cells overexpressed

Inc-ADAMTS1-2 / Inc-CES1-1 / Inc-PARK7-1. \* $P < 0.05$ . Data are presented as

mean  $\pm$ SEM. Three repeats were set up for each treatment.

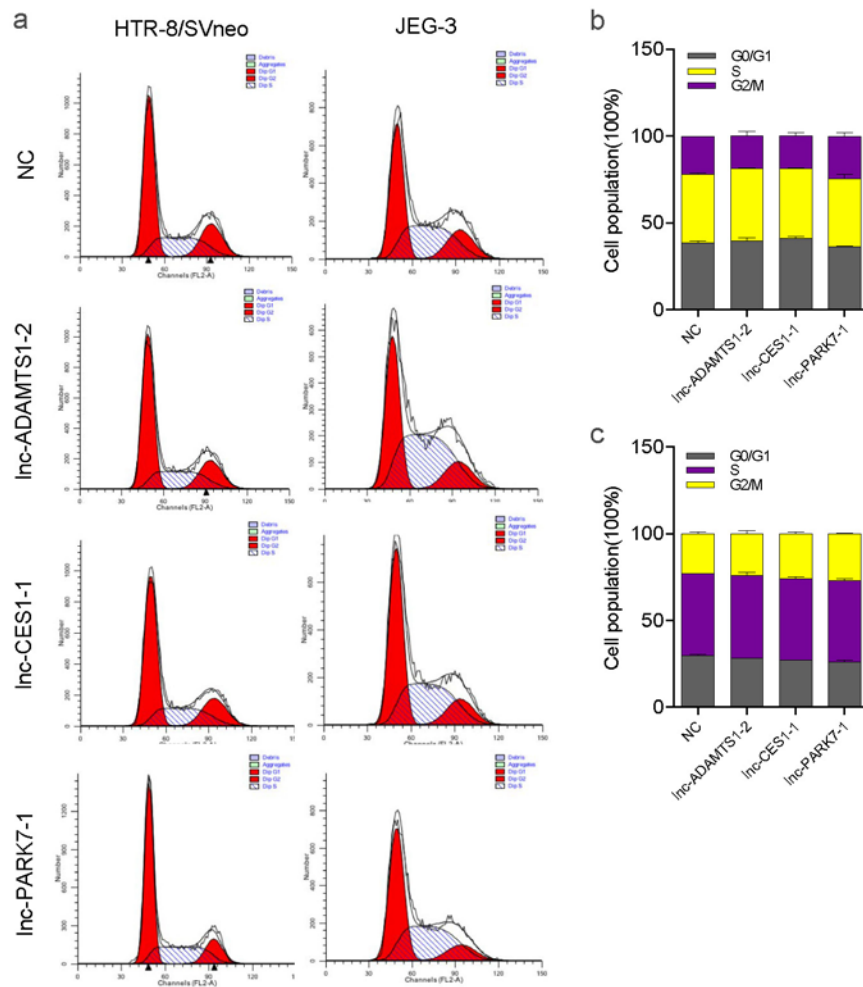

**Fig. S6.** Relative expression of knockdown *lnc-CES1-1* and *PPAR $\gamma$*  after transfection.

Transfection efficiency of (a) *lnc-CES1-1*, (c) *PPAR $\gamma$*  in HTR-8/SVneo, (b)

*lnc-CES1-1* and (d) *PPAR $\gamma$*  in JEG-3. \* $P < 0.05$ . Data are presented as mean  $\pm$ SEM.

Three repeats were set up for each treatment.

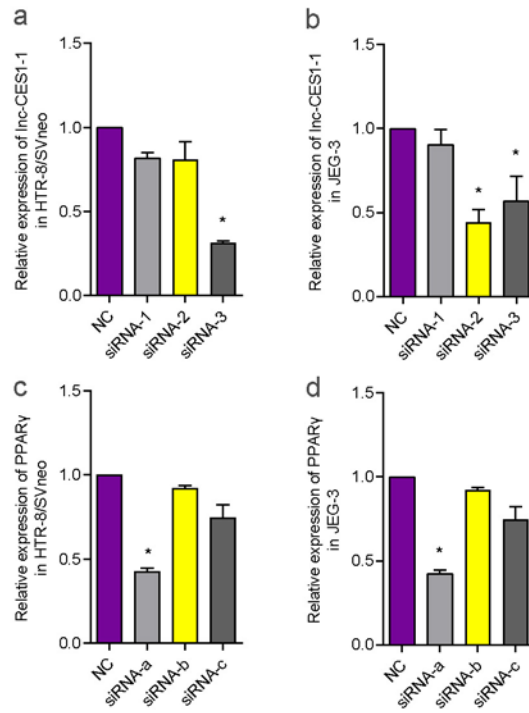

**Figure S7.** (a) RNA immunoprecipitation (RIP) followed by western blot with anti FUS to identify RNA binding protein. (b, c) Western blot of Smad3 in HTR-8/SVneo and JEG-3 cells of overexpressed lnc-CES1-1. (d, e) Western blot of FUS in HTR-8/SVneo and JEG-3 cells of overexpressed and knockdown PPAR $\gamma$ .

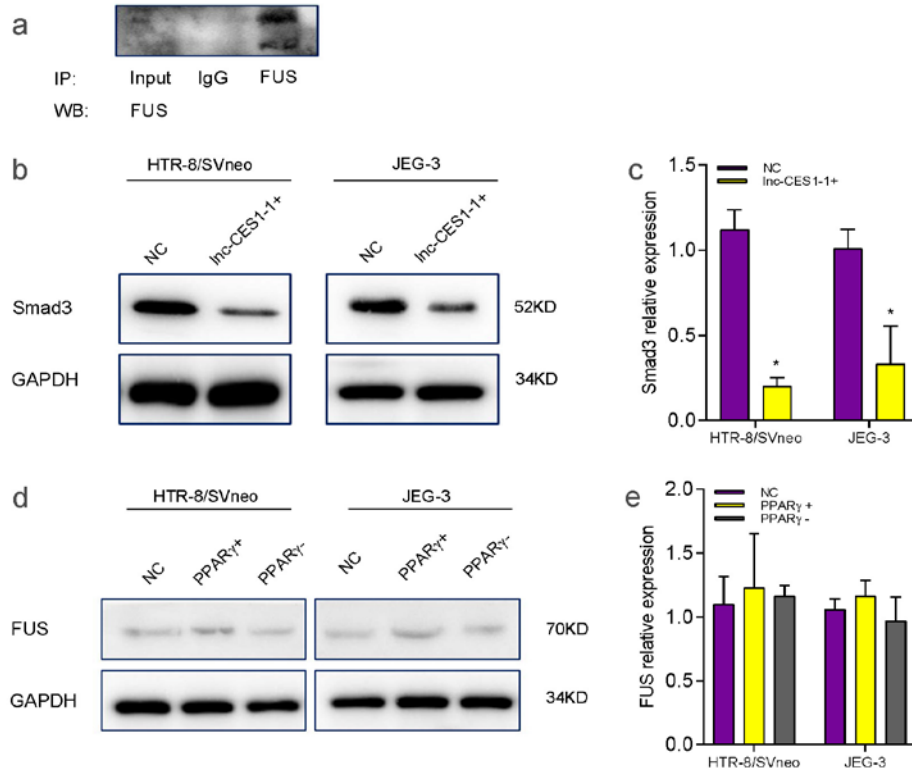

Supplement: mmc2.pdf [file mmc2.pdf]
